# Supplementary material for: Simultaneous profiling of 1-aminocyclopropane-1-carboxylic acid and selected phytohormones in plant tissues using liquid chromatography-tandem mass spectrometry
Source: Research Square preprint supplement (doi:10.21203/rs.3.rs-3837226/v1), 2024-01-09
Supplement: Supplementary file 1 [file ff098c794c4422ac8f76aa5a.pdf]

## Additional file 1

**Additional file 1: Figure S1.** Proposed scheme of 1-aminocyclopropane-1-carboxylic acid (ACC) derivatization with AccQ-Tag™ Ultra Derivatization Kit, with fragmentation

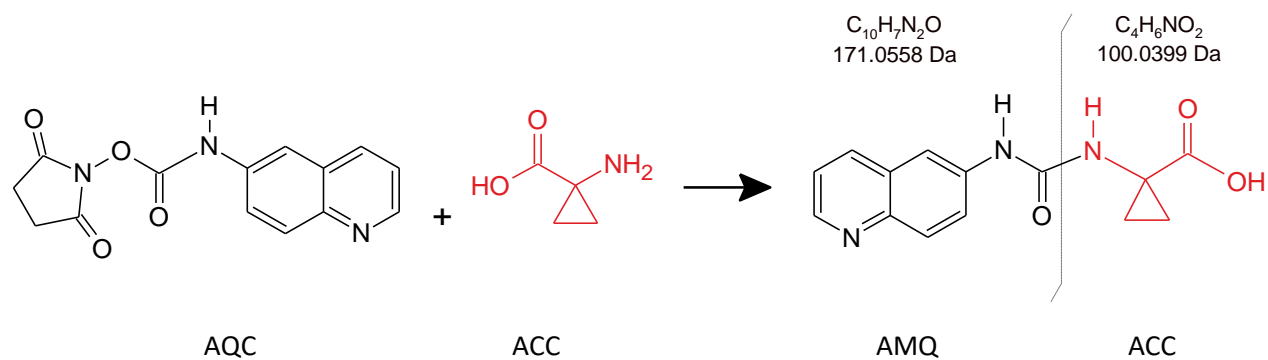

The proposed fragmentation is marked with a separating sign, with monoisotopic masses in Daltons (Da) of fragments atom summary formula, corresponding to  $m/z$  (mass-to-charge ratio) detected in LC-MS/MS.

AQC – 6-aminoquinolyl-*N*-hydroxysuccinimidyl carbamate; AMQ – amino-quinoline moiety

**Additional file 1: Table S1.** Autosampler stability

| Analyte | Autosampler<br>Stability<br>(n=4; %RSD) |
|---------|-----------------------------------------|
| ACC     | 0.45                                    |
| tZ      | 4.24                                    |
| cZ      | 3.92                                    |
| iP      | 7.50                                    |
| tZR     | 13.02                                   |
| cZR     | 4.77                                    |
| iPR     | 8.46                                    |
| IAA     | 3.59                                    |
| oxIAA   | 6.82                                    |
| IAA-Glu | 1.00                                    |
| IAA-Asp | 1.34                                    |
| ABA     | 0.54                                    |
| JA      | 1.78                                    |
| JA-Ile  | 5.59                                    |
| SA      | 5.38                                    |

Autosampler stability was examined by analyzing the same four extracted 10 mg samples of *A.thaliana* plants, with added IS, on two separate days. Each measurement result was expressed as normalized peak area (analyte/IS), and the difference of means between the two separate day measurements is expressed as %RSD. Days 1 and 2 were approximately 72 hours apart, with samples kept in the autosampler for the whole experiment duration.

**Additional file 1: Table S2.** Analyte levels in root and shoot of *A.thaliana* seedlings Col-0 and *eto2, ein2-1* ethylene mutant

| Analyte        | Col 0           |                | <i>ein2-1</i>    |                 | <i>eto2</i>     |                |
|----------------|-----------------|----------------|------------------|-----------------|-----------------|----------------|
|                | Root            | Shoot          | Root             | Shoot           | Root            | Shoot          |
| <b>ACC</b>     | 623.0 ± 125.4   | 1046.9 ± 197.8 | 4376.2 ± 715.5   | 3674.3 ± 1494.1 | 7139.4 ± 1638.5 | 2303.2 ± 199.6 |
| <b>tz</b>      | 1.17 ± 0.23     | 0.29 ± 0.02    | 1.57 ± 0.33      | 0.21 ± 0.01     | 0.64 ± 0.07     | 0.24 ± 0.03    |
| <b>cZ</b>      | 2.73 ± 0.35     | 0.44 ± 0.02    | 2.63 ± 0.34      | 0.23 ± 0.03     | 2.62 ± 0.16     | 0.35 ± 0.03    |
| <b>iP</b>      | 1.07 ± 0.07     | 0.13 ± 0.09    | 1.51 ± 0.13      | 0.11 ± 0.02     | 2.18 ± 0.24     | 0.28 ± 0.04    |
| <b>tzR</b>     | 2.39 ± 0.34     | 0.65 ± 0.10    | 28.29 ± 10.54    | 0.50 ± 0.07     | 2.71 ± 0.34     | 0.70 ± 0.04    |
| <b>cZR</b>     | 6.55 ± 1.22     | 0.67 ± 0.04    | 5.64 ± 2.71      | 0.26 ± 0.03     | 0.65 ± 0.04     | 0.25 ± 0.04    |
| <b>iPR</b>     | 1.64 ± 0.36     | 0.32 ± 0.06    | 2.92 ± 1.13      | 0.28 ± 0.03     | 0.64 ± 0.01     | 0.28 ± 0.05    |
| <b>IAA</b>     | 292.7 ± 14.2    | 135.4 ± 2.4    | 543.5 ± 112.9    | 135.0 ± 9.2     | 409.4 ± 107.0   | 112.9 ± 13.2   |
| <b>oxIAA</b>   | 2158.0 ± 160.0  | 2529.6 ± 82.3  | 1537.4 ± 361.9   | 592.3 ± 123.4   | 649.5 ± 24.5    | 601.5 ± 163.5  |
| <b>IAA-Glu</b> | 19.49 ± 5.75    | 9.29 ± 4.87    | 138.81 ± 15.66   | 4.37 ± 0.97     | 77.65 ± 11.84   | 30.53 ± 14.43  |
| <b>IAA-Asp</b> | 89.86 ± 11.73   | 34.32 ± 3.03   | 33.81 ± 14.77    | 46.56 ± 4.87    | 53.11 ± 7.75    | 63.19 ± 20.31  |
| <b>ABA</b>     | 19.99 ± 1.99    | 7.11 ± 1.99    | 35.23 ± 5.58     | 29.14 ± 4.14    | 7.18 ± 1.07     | 9.38 ± 2.77    |
| <b>JA</b>      | 48.19 ± 12.89   | 122.59 ± 29.94 | 35.14 ± 19.82    | 36.70 ± 9.05    | 13.83 ± 6.88    | 31.89 ± 13.25  |
| <b>JA-Ile*</b> | 51.38 ± 16.41   | 218.40 ± 58.15 | ND               | 60.83 ± 2.89    | ND              | 34.70 ± 12.71  |
| <b>SA</b>      | 591.24 ± 184.19 | 214.00 ± 14.59 | 2524.85 ± 208.61 | 544.09 ± 33.27  | 749.80 ± 137.24 | 217.35 ± 52.71 |

Results expressed in pmol/g FW (fresh weight) as means ± SD, n=4, except JA-Ile\*, where values (n=3).

ND – not detected.
